# Supplementary material
Source: publisher figshare collection journal article supplement (https://gsapubs.figshare.com/ndownloader/files/22397781)

## Section LT-1

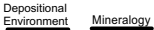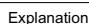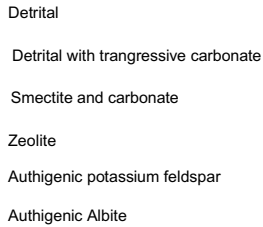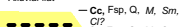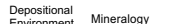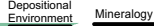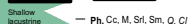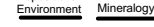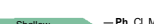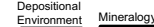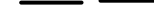

## Section LT-7

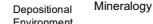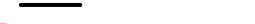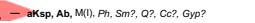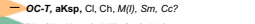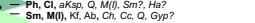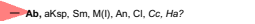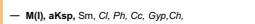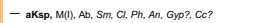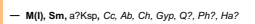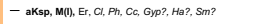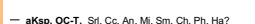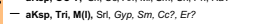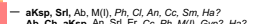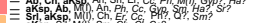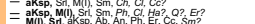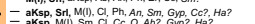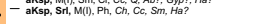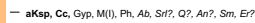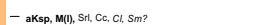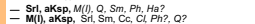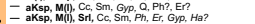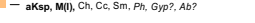

Supplement: Supplementary file 1 [file 22397781]
